# Supplementary material
Source: HighWire-hosted journal article supplement (https://bmjopen.bmj.com/content/7/12/e016949)
Supplement: inline-supplementary-material-1 [file inline-supplementary-material-1.pdf]

**Supplement 1.** Diamedix Immunosimplicity Is-CMV IgG Test Kit

(Diamedex Corporation, 2008)

The Test Kit is intended for the qualitative and semi-quantitative detection of antibodies to CMV antigen. Compared to currently used testing methods in three different United States-based laboratories, the sensitivity and specificity of the Diamedix Kit ranged from 99.3%-100.0% and 87.7%-100.0% respectively, and overall agreement ranged from 97.0%-99.0%.

Seroprevalence results detected using this kit were in agreement with prevalence rates reported in United States blood donor populations.

Diamedix. CMV IgG: Enzyme Immunoassay Test Kit. 2008;3–6.
