# Supplementary material
Source: HighWire-hosted journal article supplement (https://bmjopen.bmj.com/content/7/12/e016949)
Supplement: inline-supplementary-material-2 [file inline-supplementary-material-2.pdf]

**Supplement 2.** Correlations between SEP-related variables in the JPS Family Follow-up cohort

|                                      | Father's<br>occupation <sup>a</sup> | Maternal<br>education <sup>b</sup> | Maternal<br>religiosity <sup>c</sup> | Paternal<br>lay-<br>leadership <sup>c</sup> | Number<br>of<br>siblings <sup>b</sup> | Offspring<br>occupation <sup>a</sup> | Offspring<br>education <sup>b</sup> | Offspring<br>religiosity <sup>c</sup> | Offspring<br>parity <sup>b</sup> |
|--------------------------------------|-------------------------------------|------------------------------------|--------------------------------------|---------------------------------------------|---------------------------------------|--------------------------------------|-------------------------------------|---------------------------------------|----------------------------------|
| Father's occupation <sup>a</sup>     | 1.00                                |                                    |                                      |                                             |                                       |                                      |                                     |                                       |                                  |
| Maternal education <sup>b</sup>      | 0.52                                | 1.00                               |                                      |                                             |                                       |                                      |                                     |                                       |                                  |
| Maternal religiosity <sup>c</sup>    | 0.23                                | 0.07                               | 1.00                                 |                                             |                                       |                                      |                                     |                                       |                                  |
| Paternal lay-leadership <sup>c</sup> | 0.32                                | 0.10                               | 0.49                                 | 1.00                                        |                                       |                                      |                                     |                                       |                                  |
| Number of siblings <sup>b</sup>      | 0.10                                | -0.14                              | 0.54                                 | 0.60                                        | 1.00                                  |                                      |                                     |                                       |                                  |
| Offspring occupation <sup>a</sup>    | 0.22                                | 0.29                               | 0.00                                 | 0.02                                        | -0.10                                 | 1.00                                 |                                     |                                       |                                  |
| Offspring education <sup>b</sup>     | 0.30                                | 0.32                               | 0.19                                 | 0.22                                        | 0.08                                  | 0.38                                 | 1.00                                |                                       |                                  |
| Offspring religiosity <sup>c</sup>   | 0.19                                | 0.06                               | 0.72                                 | 0.47                                        | 0.53                                  | 0.00                                 | 0.18                                | 1.00                                  |                                  |
| Offspring parity <sup>b</sup>        | 0.14                                | -0.04                              | 0.50                                 | 0.49                                        | 0.54                                  | -0.05                                | 0.06                                | 0.57                                  | 1.00                             |

<sup>a</sup>In 6 categories; Spearman's rank correlation coefficient

<sup>b</sup>Continuous; Pearson correlation coefficient

<sup>c</sup>Dichotomous; Pearson correlation coefficient
