# Supplementary material
Source: HighWire-hosted journal article supplement (https://bmjopen.bmj.com/content/7/12/e016949)
Supplement: inline-supplementary-material-3 [file inline-supplementary-material-3.pdf]

**Supplement 3. Principal Component Analysis Loadings**

| Childhood               |                    |               | Adulthood             |                    |               |
|-------------------------|--------------------|---------------|-----------------------|--------------------|---------------|
| Variables Included      | Component Loadings |               | Variables Included    | Component Loadings |               |
|                         | Household          | Socioeconomic |                       | Household          | Socioeconomic |
| Paternal Occupation     | 0.112              | 0.656         | Offspring Occupation  | -0.111             | 0.719         |
| Maternal Education      | -0.132             | 0.723         | Offspring Education   | 0.115              | 0.690         |
| Maternal Religiosity    | 0.538              | 0.048         | Offspring Religiosity | 0.695              | 0.056         |
| Paternal Lay Leadership | 0.550              | 0.119         | Offspring Parity      | 0.701              | -0.065        |
| Number of Siblings      | 0.616              | -0.180        | Variance Explained    |                    | 75%           |
| Variance Explained      |                    | 74%           |                       |                    |               |

**Principal Component Score Distribution**

|                                 | Mean   | SD   | Minimum | Maximum |
|---------------------------------|--------|------|---------|---------|
| <b>Household Components</b>     |        |      |         |         |
| Childhood                       | -0.003 | 1.49 | -4.63   | 1.86    |
| Adulthood                       | -0.008 | 1.27 | -4.05   | 2.08    |
| <b>Socioeconomic Components</b> |        |      |         |         |
| Childhood                       | 0.04   | 1.21 | -4.14   | 3.52    |
| Adulthood                       | 0.06   | 1.15 | -3.66   | 3.02    |
