# Supplementary material
Source: HighWire-hosted journal article supplement (https://bmjopen.bmj.com/content/7/12/e016949)
Supplement: inline-supplementary-material-4 [file inline-supplementary-material-4.pdf]

**Supplement 4.** Mean<sup>a</sup> Anti-CMV IgG Titer Level<sup>b</sup> by Categories of Characteristics Obtained at Birth and Age 32 Among CMV seropositive individuals (N=1,051)

|                                           | Mean  | (SE)   | P-value <sup>c</sup> |
|-------------------------------------------|-------|--------|----------------------|
| <b>Characteristics obtained at birth</b>  |       |        |                      |
| Maternal Religiosity                      |       |        | 0.007                |
| <i>Ultra-Orthodox</i>                     | 14.34 | (6.29) |                      |
| <i>Orthodox</i>                           | 13.69 | (7.09) |                      |
| <i>Traditional</i>                        | 12.78 | (6.34) |                      |
| <i>Secular</i>                            | 12.37 | (5.90) |                      |
| Paternal Lay-Leadership                   |       |        | 0.06                 |
| <i>Yes</i>                                | 14.12 | (6.06) |                      |
| <i>No</i>                                 | 13.09 | (6.52) |                      |
| Paternal Occupation Level                 |       |        | 0.69                 |
| <i>Low</i>                                | 13.11 | (6.69) |                      |
| <i>Middle</i>                             | 13.14 | (6.53) |                      |
| <i>High</i>                               | 13.48 | (6.14) |                      |
| Maternal Education                        |       |        | 0.26                 |
| <i>&lt;9 years</i>                        | 13.82 | (7.02) |                      |
| <i>9-12 years</i>                         | 13.07 | (6.35) |                      |
| <i>&gt;12 years</i>                       | 13.00 | (6.08) |                      |
| Number of Siblings                        |       |        | 0.003                |
| <i>≤2</i>                                 | 13.02 | (6.48) |                      |
| <i>3-4</i>                                | 12.92 | (6.46) |                      |
| <i>5+</i>                                 | 13.72 | (6.30) |                      |
| <b>Characteristics obtained at age 32</b> |       |        |                      |
| Religiosity                               |       |        | 0.03                 |
| <i>Ultra-Orthodox</i>                     | 13.70 | (6.04) |                      |
| <i>Orthodox</i>                           | 14.00 | (7.08) |                      |
| <i>Traditional</i>                        | 13.12 | (6.45) |                      |
| <i>Secular</i>                            | 12.52 | (6.20) |                      |
| Occupation Level                          |       |        | 0.06                 |
| <i>Low</i>                                | 12.56 | (6.12) |                      |
| <i>Middle</i>                             | 13.90 | (7.02) |                      |
| <i>High</i>                               | 13.01 | (6.12) |                      |
| Years of Education                        |       |        | 0.32                 |
| <i>≤ 12</i>                               | 13.53 | (6.63) |                      |
| <i>&gt;12</i>                             | 13.10 | (6.33) |                      |
| Parity                                    |       |        | 0.008                |
| <i>≤2</i>                                 | 12.75 | (6.44) |                      |
| <i>3-4</i>                                | 13.73 | (6.70) |                      |
| <i>5+</i>                                 | 14.07 | (5.69) |                      |

CMV = cytomegalovirus; SE = standard error

<sup>a</sup>Sex-adjusted

<sup>b</sup>square root transformed EU/ml

<sup>c</sup>Obtained through ANOVA
