# Supplementary material
Source: HighWire-hosted journal article supplement (https://bmjopen.bmj.com/content/7/12/e016949)
Supplement: inline-supplementary-material-5 [file inline-supplementary-material-5.pdf]

**Supplement 5.** Regression Coefficients and 95% CI of CMV in Relation to Household and Socioeconomic Components<sup>b</sup> in Childhood and Adulthood Among CMV Seropositive Population

| Component <sup>b</sup> | Continuous CMV <sup>a</sup> |        |              |                      |       |              |
|------------------------|-----------------------------|--------|--------------|----------------------|-------|--------------|
|                        | Model 1 <sup>c</sup>        |        |              | Model 2 <sup>c</sup> |       |              |
|                        | Coef. <sup>d</sup>          | P      | 95% CI       | Coef. <sup>d</sup>   | P     | 95% CI       |
| <b>Household</b>       |                             |        |              |                      |       |              |
| Childhood              | -0.41                       | 0.008  | -0.71, -0.11 | -0.03                | 0.91  | -0.44, 0.39  |
| Adulthood              | -0.74                       | <0.001 | -1.07, -0.42 | -0.67                | 0.007 | -1.15, -0.18 |
| <b>Socioeconomic</b>   |                             |        |              |                      |       |              |
| Childhood              | -0.23                       | 0.24   | -0.61, 0.15  | -0.21                | 0.31  | -0.63, 0.20  |
| Adulthood              | -0.01                       | 0.94   | -0.35, 0.38  | -0.17                | 0.42  | -0.25, 0.59  |

Coef. = coefficient; CI = confidence interval; CMV = cytomegalovirus

<sup>a</sup>Continuous square root transformed EU/ml

<sup>b</sup>Created using principal component analysis detailed in methods

<sup>c</sup>Model 1 includes each component separately. Model 2 includes all four components together in model. All models adjusted for sex, maternal and paternal age at offspring birth and maternal, paternal and offspring smoking

<sup>d</sup>Coefficient = change in anti-CMV IgG titer level per increase in one unit of component (distribution characteristics in supplement 3)
