# Supplementary material
Source: HighWire-hosted journal article supplement (https://bmjopen.bmj.com/content/7/12/e016949)
Supplement: inline-supplementary-material-6 [file inline-supplementary-material-6.pdf]

**Supplement 6.** Associations between social environment and socioeconomic factors with CMV antibody in total and CMV seropositive population

|                                       | Among Total Population        |         |              |                                 |         |              | Among CMV Seropositive Only   |         |             |                                 |         |              |
|---------------------------------------|-------------------------------|---------|--------------|---------------------------------|---------|--------------|-------------------------------|---------|-------------|---------------------------------|---------|--------------|
|                                       | Univariate Model <sup>a</sup> |         |              | Multivariate Model <sup>b</sup> |         |              | Univariate Model <sup>a</sup> |         |             | Multivariate Model <sup>b</sup> |         |              |
|                                       | B                             | P-value | 95% CI       | $\beta$                         | P-value | 95% CI       | B                             | P-value | 95% CI      | $\beta$                         | P-value | 95% CI       |
| <b>Characteristics at birth</b>       |                               |         |              |                                 |         |              |                               |         |             |                                 |         |              |
| Maternal education (yrs) <sup>d</sup> | -0.32                         | <0.001  | -0.45, -0.19 | -0.35                           | <0.001  | -0.52, -0.19 | -0.11                         | 0.08    | -0.23, 0.01 | -0.22                           | 0.007   | -0.37, -0.06 |
| Maternal religiosity <sup>c</sup>     | 2.28                          | <0.001  | 1.39, 3.17   | -0.47                           | 0.51    | -1.89, 0.94  | 1.17                          | 0.005   | 0.35, 1.99  | -0.30                           | 0.65    | -1.59, 0.99  |
| Paternal lay leadership <sup>c</sup>  | 2.40                          | <0.001  | 1.09, 3.71   | -0.82                           | 0.39    | -2.70, 1.05  | 0.88                          | 0.13    | -0.26, 2.04 | -0.47                           | 0.59    | -2.18, 1.24  |
| Paternal SEP <sup>d</sup>             | -0.09                         | 0.46    | -0.34, 0.15  | 0.16                            | 0.31    | -0.15, 0.48  | 0.12                          | 0.31    | -0.11, 0.35 | 0.22                            | 0.15    | -0.08, 0.54  |
| Family size <sup>d</sup>              | 0.51                          | <0.001  | 0.34, 0.67   | 0.18                            | 0.16    | -0.07, 0.44  | 0.16                          | 0.04    | 0.007, 0.30 | 0.01                            | 0.91    | -0.22, 0.25  |
| <b>Characteristics at age 32</b>      |                               |         |              |                                 |         |              |                               |         |             |                                 |         |              |
| Education (yrs) <sup>d</sup>          | -0.15                         | 0.01    | -0.27, -0.04 | -0.07                           | 0.36    | -0.21, 0.08  | 0.01                          | 0.81    | -0.10, 0.12 | 0.10                            | 0.18    | -0.04, 0.24  |
| Religiosity <sup>c</sup>              | 2.74                          | <0.001  | 1.89, 3.60   | 2.24                            | 0.002   | 0.82, 3.66   | 1.55                          | <0.001  | 0.77, 2.34  | 1.88                            | 0.004   | 0.60, 3.17   |
| Current Family size <sup>d</sup>      | 0.79                          | <0.001  | 0.58, 1.00   | 0.22                            | 0.15    | -0.08, 0.52  | 0.28                          | 0.005   | 0.08, 0.48  | -0.13                           | 0.37    | -0.42, 0.16  |
| Current SEP <sup>d</sup>              | -0.01                         | 0.92    | -0.31, 0.28  | 0.09                            | 0.58    | -0.24, 0.43  | 0.20                          | 0.15    | -0.07, 0.48 | 0.08                            | 0.64    | -0.24, 0.39  |

<sup>a</sup>Univariate model includes each variable alone in model<sup>b</sup>Multivariate model includes all variables together in one model + offspring sex, maternal and paternal age at childbirth, maternal and paternal smoking during pregnancy and offspring smoking in young-adulthood<sup>c</sup>Treated as dichotomous variables<sup>d</sup>Treated as continuous variables<sup>e</sup>SEP in 6 levels
