# Supplementary material
Source: HighWire-hosted journal article supplement (https://bmjopen.bmj.com/content/7/12/e016949)
Supplement: inline-supplementary-material-7 [file inline-supplementary-material-7.pdf]

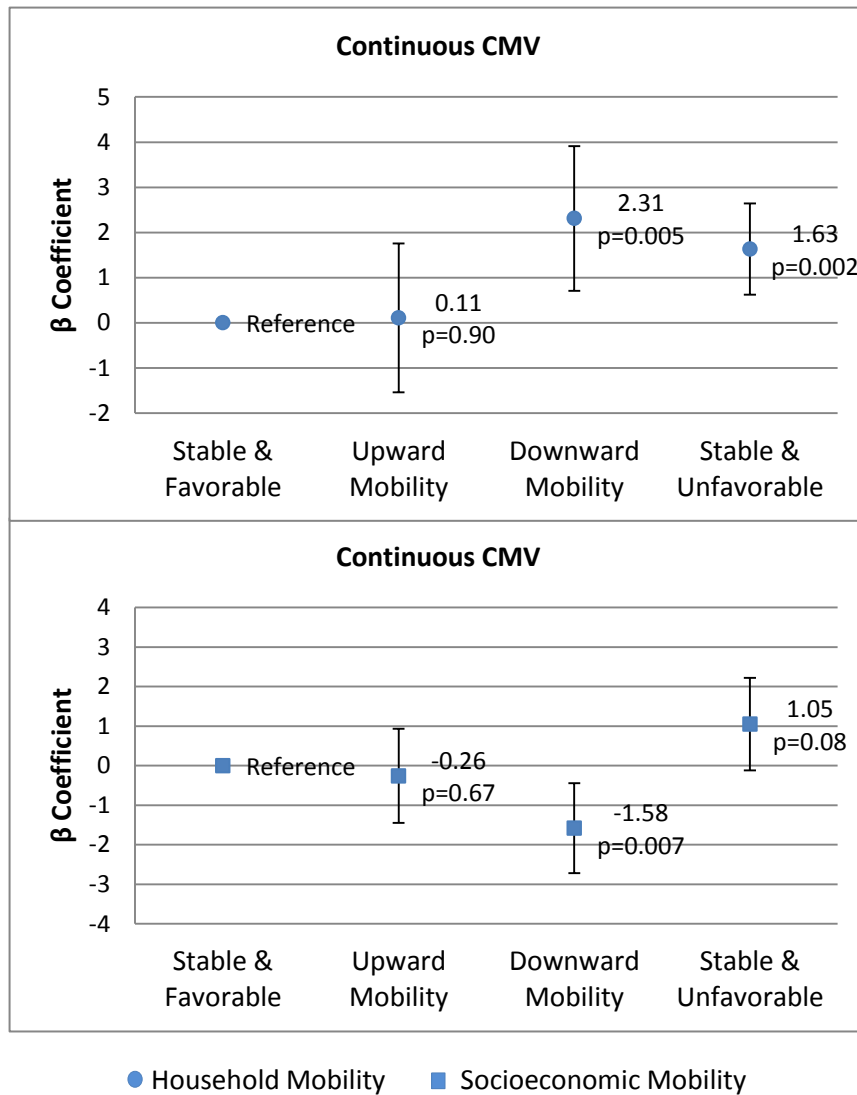

**Supplement 7.** Predicted mean anti-CMV IgG titer differences by household and socioeconomic mobility among the seropositive population. Predicted mean differences calculated via  $\beta$  coefficients from linear regression models adjusted for sex, maternal and paternal age at offspring birth and maternal, paternal and offspring smoking.
